# Supplementary material
Source: PubMed Central journal article supplement (PMC7896299)
Supplement: pnas.2025070118.sapp.pdf [file pnas.2025070118.sapp.pdf]

**Supplemental Table I:** The list of genes containing m<sup>6</sup>A sites that were hypomethylated by METTL3 knockdown under OS

| OS_siCtrl |             |             |                 |                  |        | OS_siMETTL3 |       |             |             |                 |                  |        |           |         |       |
|-----------|-------------|-------------|-----------------|------------------|--------|-------------|-------|-------------|-------------|-----------------|------------------|--------|-----------|---------|-------|
| Chr       | Start       | End         | -log10(P-value) | Log2 Fold Change | Strand | Gene        | Chr   | Start       | End         | -log10(P-value) | Log2 Fold Change | Strand | Gene      | Feature | Fold  |
| chr8      | 141,194,251 | 141,194,264 | 22.661          | 5.583            | +      | DENND3      | chr8  | 141,194,270 | 141,194,353 | 31.600          | 3.451            | +      | DENND3    | 3' UTR  | 0.228 |
| chr12     | 1,490,575   | 1,490,608   | 46.544          | 5.103            | +      | ERC1        | chr12 | 1,490,575   | 1,490,602   | 15.809          | 3.034            | +      | ERC1      | 3' UTR  | 0.238 |
| chr8      | 91,960,419  | 91,960,437  | 37.744          | 5.712            | -      | RUNX1T1     | chr8  | 91,960,431  | 91,960,473  | 11.099          | 3.968            | -      | RUNX1T1   | CDS     | 0.299 |
| chr7      | 150,573,229 | 150,573,238 | 27.127          | 4.665            | +      | GIMAP4      | chr7  | 150,573,244 | 150,573,289 | 5.540           | 3.017            | +      | GIMAP4    | 3' UTR  | 0.319 |
| chr9      | 131,260,675 | 131,260,760 | 30.905          | 4.711            | -      | FAM78A      | chr9  | 131,260,556 | 131,260,616 | 5.262           | 3.111            | -      | FAM78A    | 3' UTR  | 0.330 |
| chr11     | 35,619,499  | 35,619,508  | 26.062          | 4.862            | +      | FJX1        | chr11 | 35,619,350  | 35,619,384  | 31.883          | 3.321            | +      | FJX1      | CDS     | 0.344 |
| chr8      | 27,672,631  | 27,672,668  | 31.254          | 5.151            | +      | SCARA3      | chr8  | 27,672,678  | 27,672,700  | 10.747          | 3.633            | +      | SCARA3    | 3' UTR  | 0.349 |
| chr20     | 50,891,296  | 50,891,302  | 57.548          | 4.631            | -      | ADNP        | chr20 | 50,891,259  | 50,891,274  | 22.040          | 3.128            | -      | ADNP      | 3' UTR  | 0.353 |
| chr3      | 42,536,959  | 42,537,017  | 32.324          | 5.794            | +      | VIPR1       | chr3  | 42,537,258  | 42,537,316  | 11.809          | 4.367            | +      | VIPR1     | 3' UTR  | 0.372 |
| chr7      | 44,883,034  | 44,883,039  | 67.183          | 6.007            | +      | PURB        | chr7  | 44,883,003  | 44,883,040  | 85.366          | 4.674            | -      | PURB      | 3' UTR  | 0.397 |
| chr19     | 52,612,852  | 52,612,875  | 17.752          | 4.427            | -      | ZNF83       | chr19 | 52,612,881  | 52,612,947  | 7.246           | 3.139            | -      | ZNF83     | 3' UTR  | 0.410 |
| chr12     | 12,330,321  | 12,330,342  | 78.319          | 4.666            | -      | MANSC1      | chr12 | 12,330,482  | 12,330,550  | 28.095          | 3.397            | -      | MANSC1    | CDS     | 0.415 |
| chr8      | 17,645,678  | 17,645,682  | 55.911          | 4.966            | -      | MTUS1       | chr8  | 17,645,683  | 17,645,700  | 28.793          | 3.727            | -      | MTUS1     | 3' UTR  | 0.424 |
| chr17     | 5,501,517   | 5,501,523   | 12.538          | 4.941            | -      | NLRP1       | chr17 | 5,501,475   | 5,501,527   | 8.537           | 3.708            | -      | NLRP1     | 3' UTR  | 0.426 |
| chr13     | 109,756,093 | 109,756,163 | 31.861          | 6.246            | -      | IRS2        | chr13 | 109,755,594 | 109,755,638 | 24.286          | 5.018            | -      | IRS2      | 3' UTR  | 0.427 |
| chr1      | 64,692,106  | 64,692,127  | 14.129          | 4.820            | +      | CACHD1      | chr1  | 64,691,951  | 64,691,977  | 7.521           | 3.597            | +      | CACHD1    | 3' UTR  | 0.428 |
| chr3      | 48,158,817  | 48,158,827  | 52.498          | 6.053            | -      | CDC25A      | chr3  | 48,158,828  | 48,158,837  | 30.830          | 4.832            | -      | CDC25A    | 3' UTR  | 0.429 |
| chr6      | 138,424,226 | 138,424,240 | 400.000         | 5.264            | -      | NHSL1       | chr6  | 138,424,165 | 138,424,173 | 52.901          | 4.062            | -      | NHSL1     | CDS     | 0.435 |
| chr2      | 236,165,632 | 236,165,632 | 13.168          | 4.655            | -      | GBX2        | chr2  | 236,165,564 | 236,165,613 | 15.962          | 3.473            | -      | GBX2      | 3' UTR  | 0.441 |
| chr19     | 16,893,950  | 16,893,985  | 13.578          | 4.355            | -      | CPAMD8      | chr19 | 16,894,292  | 16,894,334  | 4.289           | 3.266            | -      | CPAMD8    | CDS     | 0.470 |
| chr9      | 128,107,706 | 128,107,792 | 47.431          | 4.580            | +      | SLC25A25    | chr9  | 128,107,476 | 128,107,534 | 15.254          | 3.545            | +      | SLC25A25  | 3' UTR  | 0.488 |
| chr21     | 37,512,439  | 37,512,446  | 56.790          | 5.045            | +      | DYRK1A      | chr21 | 37,512,447  | 37,512,509  | 400.000         | 4.069            | +      | DYRK1A    | CDS     | 0.509 |
| chr10     | 100,548,243 | 100,548,321 | 49.926          | 4.169            | +      | HIF1AN      | chr10 | 100,548,202 | 100,548,322 | 33.677          | 3.211            | +      | HIF1AN    | 3' UTR  | 0.515 |
| chr6      | 12,120,476  | 12,120,527  | 20.548          | 3.934            | +      | HIVEP1      | chr6  | 12,121,101  | 12,121,114  | 8.892           | 3.003            | +      | HIVEP1    | CDS     | 0.525 |
| chr4      | 20,619,406  | 20,619,413  | 18.667          | 4.103            | +      | SLIT2       | chr4  | 20,619,196  | 20,619,274  | 18.912          | 3.177            | +      | SLIT2     | 3' UTR  | 0.526 |
| chr19     | 40,033,505  | 40,033,610  | 11.023          | 4.494            | -      | ZNF780B     | chr19 | 40,033,502  | 40,033,619  | 9.793           | 3.594            | -      | ZNF780B   | 3' UTR  | 0.536 |
| chr12     | 50,986,944  | 50,986,954  | 14.508          | 4.233            | -      | SLC11A2     | chr12 | 50,986,954  | 50,987,003  | 10.784          | 3.361            | -      | SLC11A2   | 3' UTR  | 0.546 |
| chr16     | 20,735,093  | 20,735,102  | 49.917          | 5.425            | -      | THUMPD1     | chr16 | 20,735,103  | 20,735,121  | 35.148          | 4.553            | -      | THUMPD1   | 3' UTR  | 0.547 |
| chr15     | 90,229,379  | 90,229,429  | 12.290          | 4.643            | +      | SEMA4B      | chr15 | 90,229,378  | 90,229,391  | 14.470          | 3.848            | +      | SEMA4B    | 3' UTR  | 0.576 |
| chr1      | 183,926,300 | 183,926,337 | 30.423          | 3.909            | +      | RGL1        | chr1  | 183,926,325 | 183,926,338 | 12.829          | 3.115            | +      | RGL1      | 3' UTR  | 0.577 |
| chr1      | 64,692,127  | 64,692,203  | 17.537          | 4.684            | +      | CACHD1      | chr1  | 64,691,977  | 64,692,027  | 10.374          | 3.973            | +      | CACHD1    | 3' UTR  | 0.611 |
| chr1      | 25,567,560  | 25,567,571  | 49.834          | 5.119            | +      | LDLRAP1     | chr1  | 25,567,582  | 25,567,662  | 47.335          | 4.416            | +      | LDLRAP1   | 3' UTR  | 0.614 |
| chr9      | 107,485,495 | 107,485,551 | 22.813          | 4.174            | -      | KLF4        | chr9  | 107,485,546 | 107,485,578 | 25.326          | 3.483            | -      | KLF4      | 3' UTR  | 0.619 |
| chr8      | 41,932,095  | 41,932,128  | 21.374          | 4.449            | -      | KAT6A       | chr8  | 41,931,910  | 41,931,981  | 13.533          | 3.800            | -      | KAT6A     | 3' UTR  | 0.638 |
| chr8      | 13,085,663  | 13,085,671  | 59.849          | 4.667            | -      | DLC1        | chr8  | 13,085,676  | 13,085,682  | 400.000         | 4.075            | -      | DLC1      | 3' UTR  | 0.664 |
| chr6      | 107,068,577 | 107,068,644 | 6.504           | 4.256            | -      | BEND3       | chr6  | 107,068,444 | 107,068,507 | 8.048           | 3.731            | -      | BEND3     | 3' UTR  | 0.695 |
| chr9      | 4,860,420   | 4,860,445   | 6.742           | 3.565            | +      | RCL1        | chr9  | 4,860,419   | 4,860,471   | 14.365          | 3.053            | +      | RCL1      | 3' UTR  | 0.701 |
| chr16     | 25,239,375  | 25,239,406  | 7.507           | 4.259            | -      | ZKSCAN2     | chr16 | 25,239,326  | 25,239,415  | 12.385          | 3.811            | -      | ZKSCAN2   | 3' UTR  | 0.733 |
| chr7      | 129,212,462 | 129,212,517 | 22.898          | 4.937            | +      | SMO         | chr7  | 129,212,460 | 129,212,518 | 11.643          | 4.514            | +      | SMO       | 3' UTR  | 0.746 |
| chr8      | 23,117,106  | 23,117,112  | 20.718          | 4.162            | +      | TNFRSF10C   | chr8  | 23,117,104  | 23,117,147  | 26.657          | 3.823            | +      | TNFRSF10C | 3' UTR  | 0.791 |
| chr19     | 2,477,946   | 2,477,959   | 25.701          | 3.579            | +      | GADD45B     | chr19 | 2,477,945   | 2,477,957   | 400.000         | 3.259            | +      | GADD45B   | 3' UTR  | 0.801 |
| chr6      | 137,878,690 | 137,878,768 | 7.258           | 4.194            | +      | TNFAIP3     | chr6  | 137,878,705 | 137,878,773 | 13.204          | 3.877            | +      | TNFAIP3   | CDS     | 0.803 |
| chr7      | 55,206,343  | 55,206,372  | 31.308          | 5.142            | +      | EGFR        | chr7  | 55,206,372  | 55,206,440  | 41.353          | 4.944            | +      | EGFR      | 3' UTR  | 0.872 |
| chr2      | 239,052,438 | 239,052,520 | 7.334           | 4.390            | -      | HDAC4       | chr2  | 239,052,525 | 239,052,609 | 9.673           | 4.215            | -      | HDAC4     | 3' UTR  | 0.886 |
| chr11     | 6,391,889   | 6,391,894   | 40.787          | 3.423            | +      | SMPD1       | chr11 | 6,391,903   | 6,391,965   | 47.744          | 3.382            | +      | SMPD1     | CDS     | 0.972 |

**Supplemental Table II: Primer information**

| Gene Name          | Gene #      | Primer name   | Sequence                                  | Tm | Product size |                           |
|--------------------|-------------|---------------|-------------------------------------------|----|--------------|---------------------------|
| <b>Mettl3</b>      | NM_019852.4 | hMettl3QF     | TGGGGGTATGAACGGGTAGA                      | 60 | 149          | RT-PCR                    |
|                    |             | hMettl3QR     | TGGTTGAAGCCTTGGGGATT                      |    |              |                           |
| <b>Ythdf1</b>      | NM_017798   | hYthdf1QF     | GACTTTGAGCCCTACCTTACTG                    | 55 | 131          | RT-PCR                    |
|                    |             | hYthdf1QR     | GACCACGGAGCCTCATTG                        |    |              |                           |
| <b>Ythdf2</b>      | NM_016258   | hYthdf2QF     | TCTGGAAAAGGCTAAGCAGG                      | 57 | 145          | RT-PCR                    |
|                    |             | hYthdf2QR     | CTTTTATTTCCCACGACCTTGAC                   | 57 |              |                           |
| <b>Ythdf3</b>      | NM_152758   | hYthdf3QF     | TAGGTGTTGTACCTGTCACT                      | 55 | 122          | RT-PCR                    |
|                    |             | hYthdf3QR     | ACGTCCATTCTCAGATTCC                       | 55 |              |                           |
| <b>KLF4</b>        | NM_004235.6 | hKlf4QF       | CCGCTCCATTACCAAGAGCT                      | 60 | 76           | RT-PCR                    |
|                    |             | hKlf4QR       | ATCGTCTCCCTCTTTGGC                        |    |              |                           |
| <b>NLRP1</b>       | NM_033004.4 | hNLRP1_F      | G TTCAGGGATGCTGGAAATA                     | 55 | 207          | RT-PCR                    |
|                    |             | hNLRP1_R      | CTGGAGGGATCAGAGTAGTT                      | 55 |              |                           |
| <b>NLRP1</b>       | NM_033004.4 | hNLRP1_pos1F  | TCTTCCAGTGCTTG CAGGC                      | 60 | 200          | meRIP-qPCR                |
|                    |             | hNLRP1_pos1R  | GATGTTCCAGGTGGTGAGG                       | 60 |              |                           |
|                    |             | hNLRP1_pos2F  | CTGAAGGAGACCCATCCTCAC                     | 57 | 139          | meRIP-qPCR                |
|                    |             | hNLRP1_pos2R  | ACCCAAGAAGGGTCAGCCA                       | 57 |              |                           |
|                    |             | hNLRP1_pos3F  | AGCATCTCAGGGAATGTCCA                      | 60 | 160          | meRIP-qPCR                |
|                    |             | hNLRP1_pos3R  | TGACACAGCCAGAGGCAATG                      | 60 |              |                           |
| <b>KLF4</b>        | NM_004235.6 | hKlf4_pos1F   | AAGAAGAAGGATCTCGGCCA                      | 60 | 155          | meRIP-qPCR                |
|                    |             | hKlf4_pos1R   | CATGTCAGACTCGCCAGGTG                      | 60 |              |                           |
|                    |             | hKlf4_pos2F   | ACCTTACCAGTGTGACTGGG                      | 60 | 131          | meRIP-qPCR                |
|                    |             | hKlf4_pos2R   | ACCTGGAAAATGCTCGGTCTG                     | 60 |              |                           |
|                    |             | hKlf4_pos3F   | TGGTCAAGTCCCAACTGAGTC                     | 60 | 181          | meRIP-qPCR                |
|                    |             | hKlf4_pos3R   | TCCACAACCTTCCAGTCACCC                     | 60 |              |                           |
| <b>M13</b>         |             | M13_F         | TGTAAAACGACGGCCAGT                        | 55 |              | RIP                       |
|                    |             | M13_R         | CAGGAAACAGCTATGAC                         | 55 |              |                           |
| <b>Mettl3/APPA</b> |             | Mettl3/APPA-F | gcagttgtagtgctgccccacccgoggatattccatggaa  | 55 |              | site-directed mutagenesis |
|                    |             | Mettl3/APPA-R | ttocatgtaatatccgoggtggggcagccatcacaaactgc | 55 |              |                           |

Supplemental Figure 1

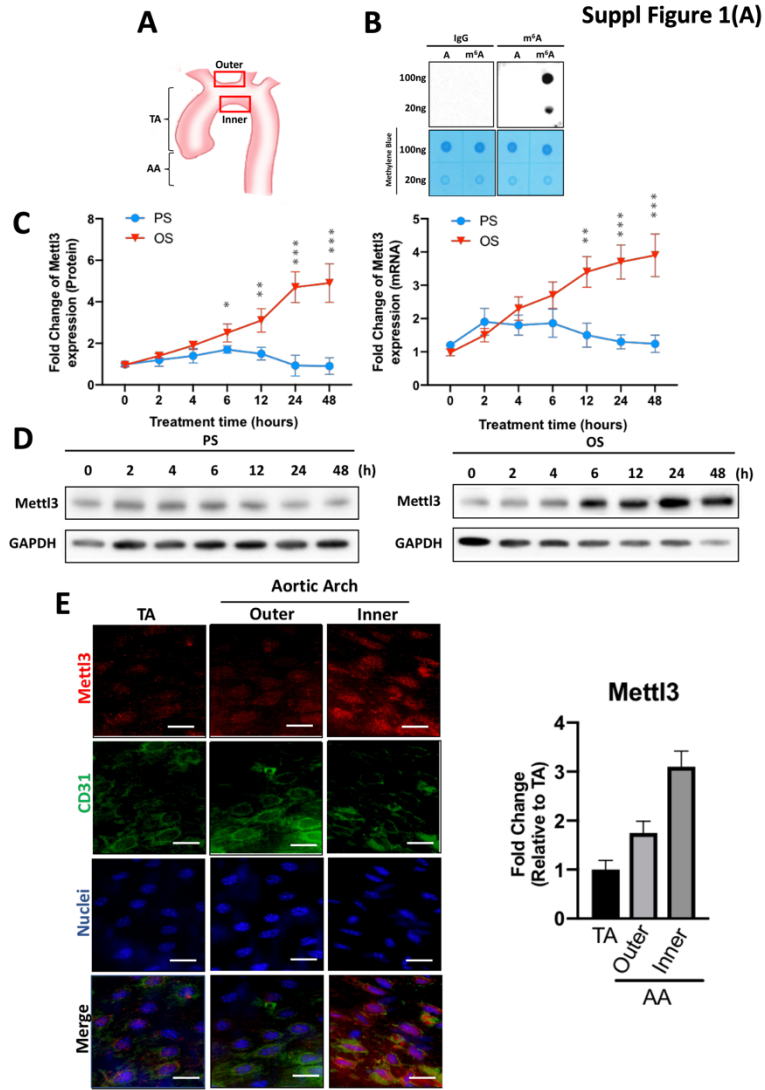

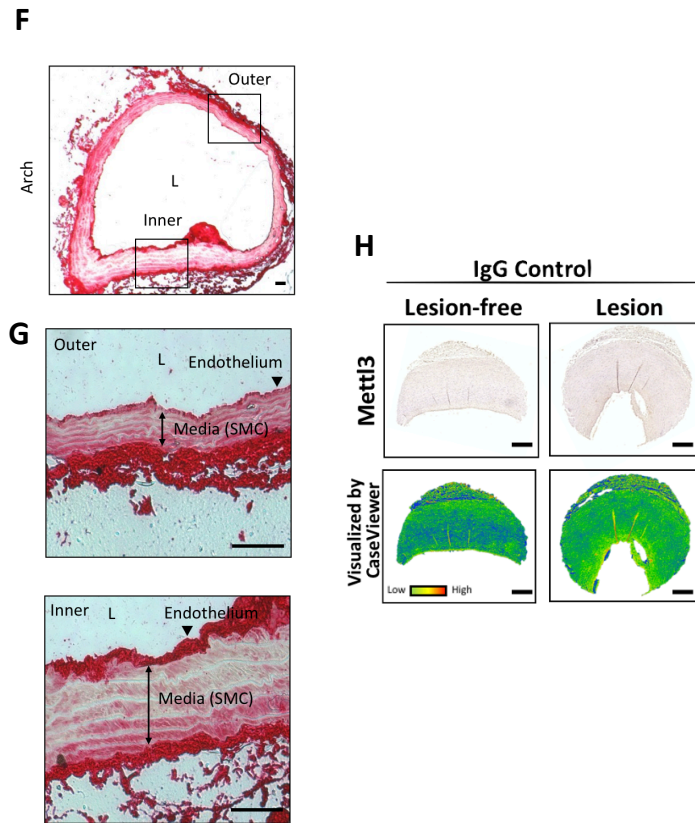

**Supplemental Figure 1: Comparison of METTL3 expression in the endothelium of the inner AA and the outer AA from wild-type control mice.** (A) Schemes showing the regions of thoracic aorta (TA) and aortic arch (AA). (B) Specificity validation of m6A dot blot. (C) Shear pattern- and time-dependent increase of METTL3 mRNA and (D) protein expression over a 48-hour time course. (E) Left: En face immunofluorescence staining showing the expression of METTL3 in arterial endothelium of TA and outer and inner parts of AA. Right: quantification showing mean fluorescence intensity values relative to TA with SD error bars. (F-G) Immunohistochemistry of METTL3 protein expression in the endothelium of the outer AA (Panel F, Upper) and the inner AA (Panel F, Lower) from control untreated C57BL/6 mice. (H) Specificity validation of METTL3 immunofluorescence.

Supplemental Figure 2

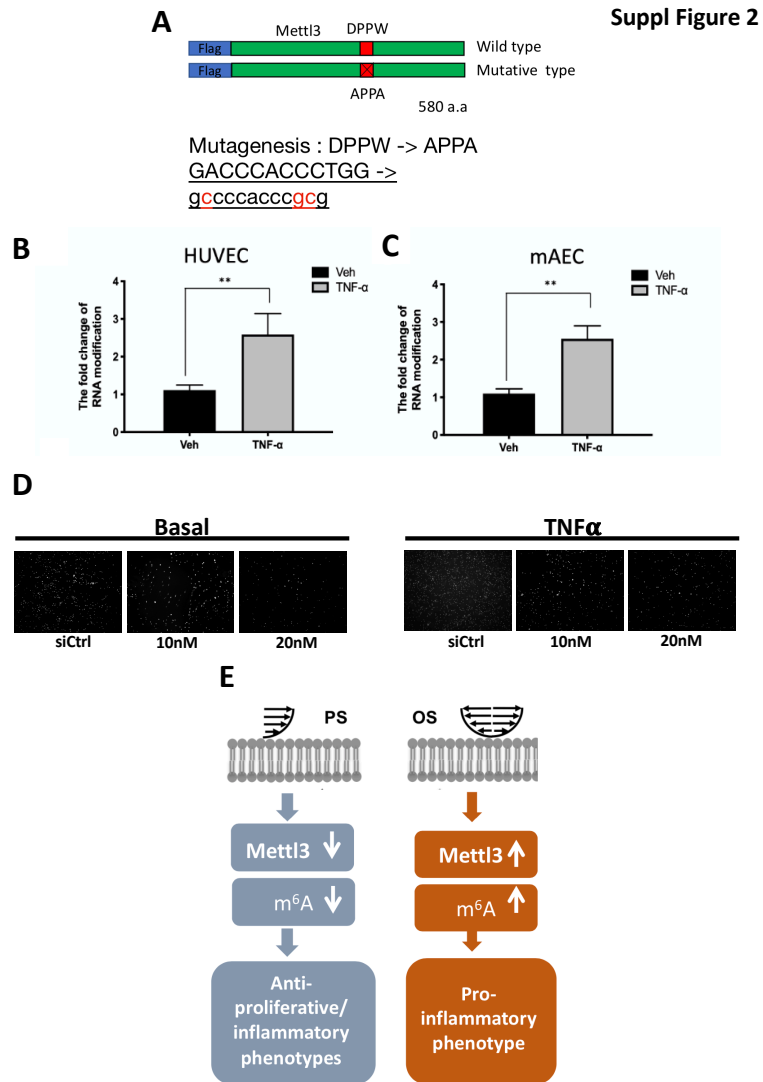

**Supplemental Figure 2: METTL3 as a mediator of the pro-atherogenic process in ECs in response to disturbed flow.** (A) Schemes showing the sequence for wild-type METTL3 and its catalytic mutant form, METTL3 APPA. (B~C) LCMS analysis showing the m6A modification of mRNA with or without TNF- $\alpha$  stimulation in both HUVECs (Panel B) and HAECs (Panel C). (D) Representative images of monocyte adhesion on TNF- $\alpha$ -stimulated HUVECs with or without Mettl3 knockdown. (E) Scheme showing METTL3 as a mediator of the pro-atherogenic inflammatory effects in ECs subjected to disturbed flow.

Supplemental Figure 3

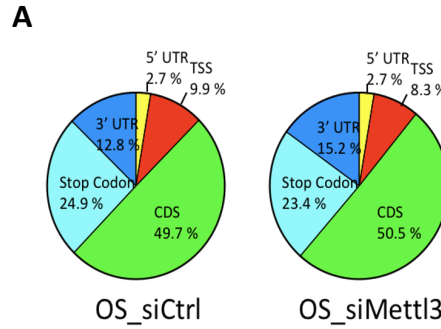

Suppl Figure 3

**B**

| ID       | Location            | Family                     | Fold-enrich | ID       | Location            | Family        | Fold-enrich |
|----------|---------------------|----------------------------|-------------|----------|---------------------|---------------|-------------|
| CD40     | Plasma Membrane     | transmembrane receptor     | 0.205       | SLC7A2   | Plasma Membrane     | transporter   | 2.750       |
| SLC11A2  | Plasma Membrane     | transporter                | 0.170       | RIIP7    | Nucleus             | transcription | 2.095       |
| SCN1B    | Plasma Membrane     | ion channel                | 0.162       | ENKAF    | Extracellular Space | cytokine      | 2.044       |
| PLATE    | Plasma Membrane     | other                      | 0.161       | LAMP5    | Plasma Membrane     | other         | 2.001       |
| TMPT1    | Extracellular Space | cytokine                   | 0.142       | DCBLD2   | Plasma Membrane     | other         | 4.087       |
| CST3     | Plasma Membrane     | transmembrane receptor     | 0.142       | MD1      | Nucleus             | transcription | 3.881       |
| LIR3A    | Plasma Membrane     | transmembrane receptor     | 0.140       | PANX2    | Nucleus             | enzyme        | 0.981       |
| CD57     | Plasma Membrane     | other                      | 0.140       | SLC22A10 | Plasma Membrane     | transporter   | 0.492       |
| TNFRSF5  | Extracellular Space | cytokine                   | 0.141       | COL3A1   | Extracellular Space | other         | 0.498       |
| CCDC14   | Plasma Membrane     | G-protein coupled receptor | 0.094       | CTTR     | Nucleus             | transcription | 0.492       |
| TNFRSF1B | Plasma Membrane     | transmembrane receptor     | 0.094       | STC17    | Nucleus             | transcription | 0.517       |
| PTM1     | Plasma Membrane     | transmembrane receptor     | 0.090       | LRP1     | Nucleus             | transporter   | 0.819       |
| PC4B     | Cytosol             | enzyme                     | 0.093       | PANX4    | Nucleus             | enzyme        | 1.527       |
| SIMAD    | Plasma Membrane     | transmembrane receptor     | 0.090       | LALP     | Cytosol             | transcription | 1.214       |
| RNF138   | Cytosol             | enzyme                     | 0.090       | TYLDP    | Nucleus             | other         | 1.527       |
| SOXPT1   | Plasma Membrane     | transmembrane receptor     | 0.027       | BAZ1B    | Nucleus             | transcription | 0.98        |
| AC10A    | Plasma Membrane     | kinase                     | 1.315       | PARC     | Nucleus             | enzyme        | 1.581       |
| PSEN1    | Plasma Membrane     | peptidase                  | 1.325       | PANCC    | Nucleus             | other         | 1.593       |
| HLA      | Extracellular Space | transcription regulator    | 1.470       | PARC2    | Nucleus             | other         | 1.707       |
| HES1F    | Extracellular Space | growth factor              | 1.477       | PARL2    | Nucleus             | other         | 1.706       |
| HEST1    | Plasma Membrane     | ion channel                | 1.038       | SMAD3    | Nucleus             | transcription | 2.048       |
| PVR      | Plasma Membrane     | other                      | 1.940       | IFCC2    | Nucleus             | transcription | 2.113       |
| INDC5    | Cytosol             | enzyme                     | 1.060       | IFCC3    | Nucleus             | transcription | 2.113       |
| EDN1     | Extracellular Space | cytokine                   | 1.814       | LOX      | Extracellular Space | enzyme        | 2.048       |
| SLC14A1  | Plasma Membrane     | transporter                | 1.623       | PANX5    | Nucleus             | other         | 2.060       |
| IKK2     | Plasma Membrane     | kinase                     | 1.038       | TGFR1    | Plasma Membrane     | kinase        | 2.038       |
| MEI      | Plasma Membrane     | transporter                | 1.623       | CTSD1    | Nucleus             | transcription | 1.716       |
| MIT      | Plasma Membrane     | kinase                     | 1.767       | PANCA    | Nucleus             | other         | 2.848       |
| NRX1A    | Cytosol             | transcription regulator    | 1.775       | BP1A1    | Nucleus             | transcription | 3.551       |
| NFY1     | Cytosol             | transcription regulator    | 1.828       | METL3    | Nucleus             | enzyme        | 3.201       |
| VP1      | Extracellular Space | other                      | 2.071       | NLRP1    | Cytosol             | other         | 0.453       |
| EDS      | Plasma Membrane     | G-protein coupled receptor | 2.102       | SMYD3    | Cytosol             | enzyme        | 0.452       |
| MYC      | Nucleus             | transcription regulator    | 2.208       | PCSKD    | Cytosol             | transcription | 0.452       |
| CEP350   | Extracellular Space | other                      | 2.202       | CEP1     | Cytosol             | enzyme        | 0.522       |
| IL1A     | Extracellular Space | cytokine                   | 2.247       | APP      | Plasma Membrane     | other         | 0.578       |
| SELE     | Plasma Membrane     | transmembrane receptor     | 2.247       | PANX1    | Plasma Membrane     | transporter   | 1.689       |
| LTR      | Plasma Membrane     | transmembrane receptor     | 2.385       | KLF4     | Nucleus             | transcription | 2.980       |
| AOL      | Plasma Membrane     | kinase                     | 2.485       | TDRP     | Cytosol             | other         | 2.470       |
| ABCA1    | Plasma Membrane     | transporter                | 2.676       |          |                     |               |             |

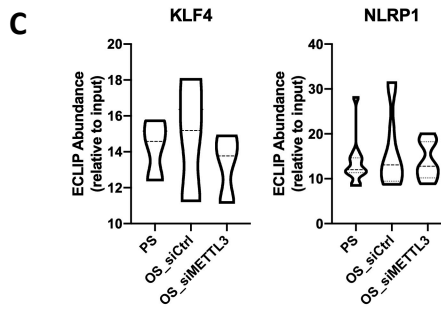

**Supplemental Figure 3: Involvement of METTL3-hypermethylated genes in atherosclerosis.** (A) The pie chart depicts the relative frequency of peaks in OS-treated ECs with or without *Mettl3* knockdown. The pie chart depicts the relative frequency of peaks that map to each feature type, with a peak log2 fold enrichment  $\geq 3$  and p-value  $\leq 0.001$ . (B) The list of genes affected by METTL3-knockdown under OS. (C) The eCLIP abundance of NLRP1 and KLF4 among PS-treated cells, OS-treated cells with either siCtrl or siMETTL3.

## Supplemental Figure 4

## Suppl Figure 4

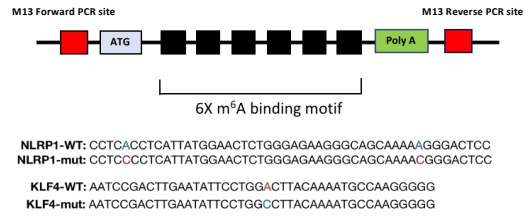

**Supplemental Figure 4:** The plasmid design of NLRP1 and KLF4 RNA fragments with either wild-type (WT) or mutated (mut) m6A sites.
